# Supplementary material
Source: publisher figshare collection journal article supplement (https://acs.figshare.com/ndownloader/files/3740794)
Supplement: Supplementary file 1 [file 3740794]

## Supporting Information

### **Templateless Infrared Heating Process for Fabricating Carbon Nitride Nanorods with Efficient Photocatalytic H<sub>2</sub> Evolution**

Hui-Jun Li,<sup>†</sup> Dong-Jin Qian<sup>†</sup> and Meng Chen<sup>\*†</sup>

<sup>†</sup>Department of Chemistry, Shanghai Key Laboratory of Molecular Catalysis and Innovative Materials, Fudan University, Shanghai 200433, P. R. China

\*E-mail: chenmeng@fudan.edu.cn

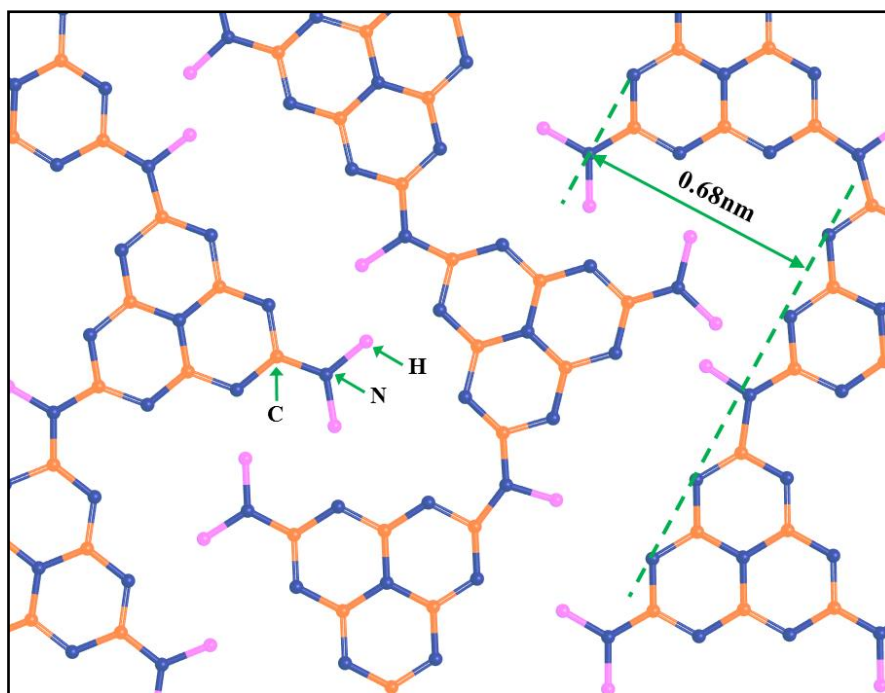

**Figure S1.** Structure models of carbon nitride sheets of polymeric melon.

**Table S1.** Elemental composition of the carbon nitrides synthesized at different heating powers obtained using C/H/N analysis

| Samples | Carbon atom% | Nitrogen atom% | Hydrogen atom% | Oxygen atom% | n(C)/n(N) |
|---------|--------------|----------------|----------------|--------------|-----------|
| CN-35%  | 26.71        | 45.16          | 26.73          | 1.4          | 0.591     |
| CN-40%  | 27.94        | 43.89          | 26.1           | 2.07         | 0.636     |
| CN-50%  | 29.18        | 45.18          | 23.02          | 2.62         | 0.646     |
| CN-70%  | 29.59        | 46.14          | 21.42          | 2.85         | 0.641     |
| CN-100% | 29.83        | 45.56          | 20.8           | 3.81         | 0.655     |

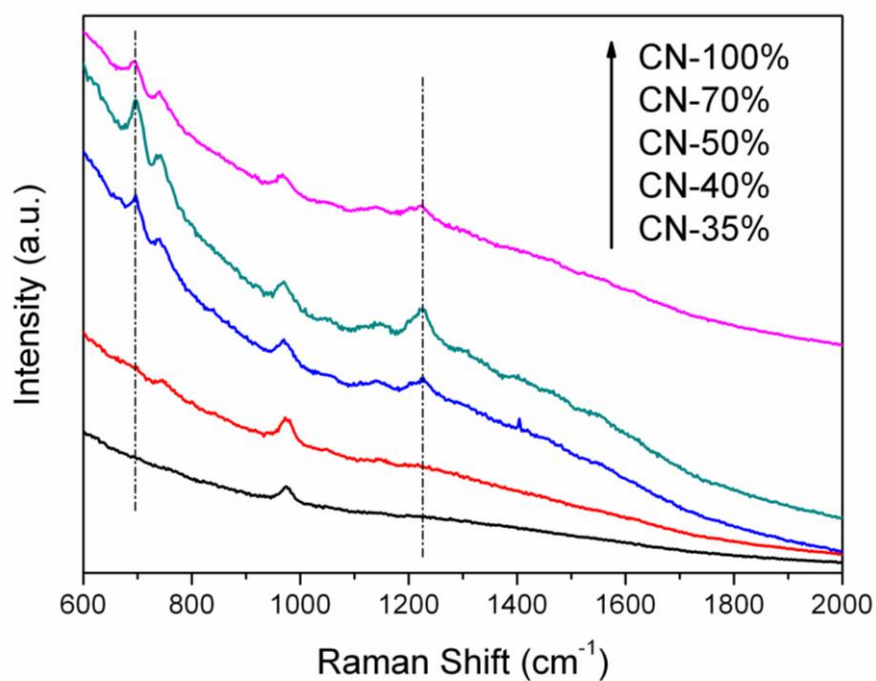

**Figure S2.** Raman spectra of the carbon nitrides synthesized at different heating powers.

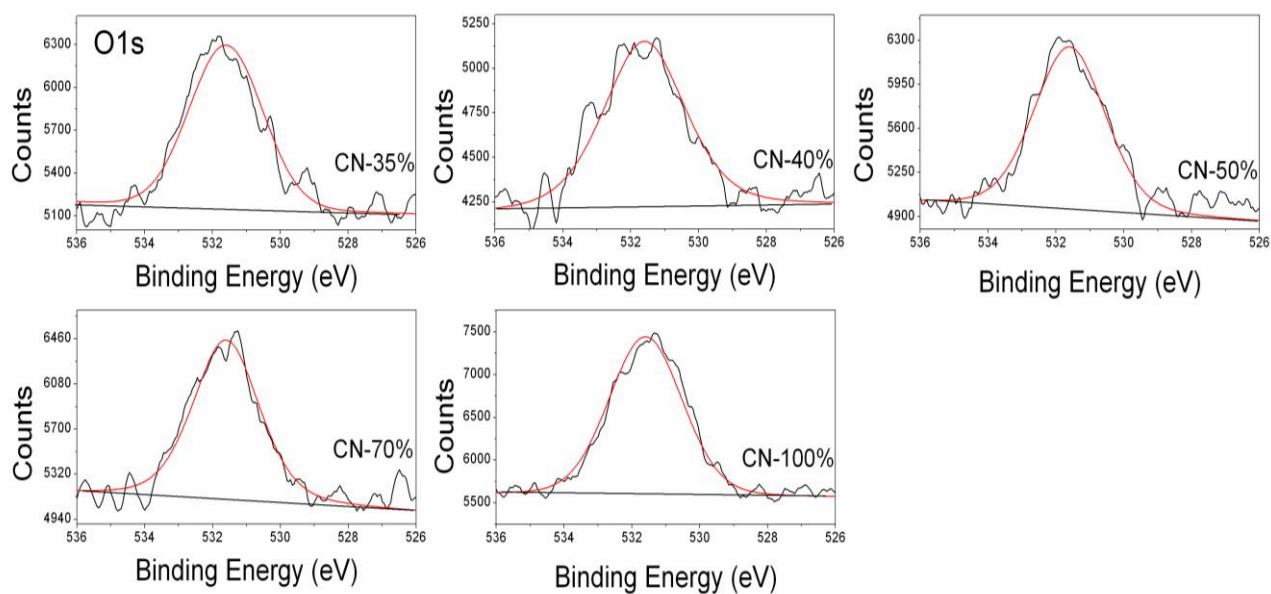

**Figure S3.** O 1s XPS high-resolution spectra of the carbon nitrides synthesized at different heating powers.

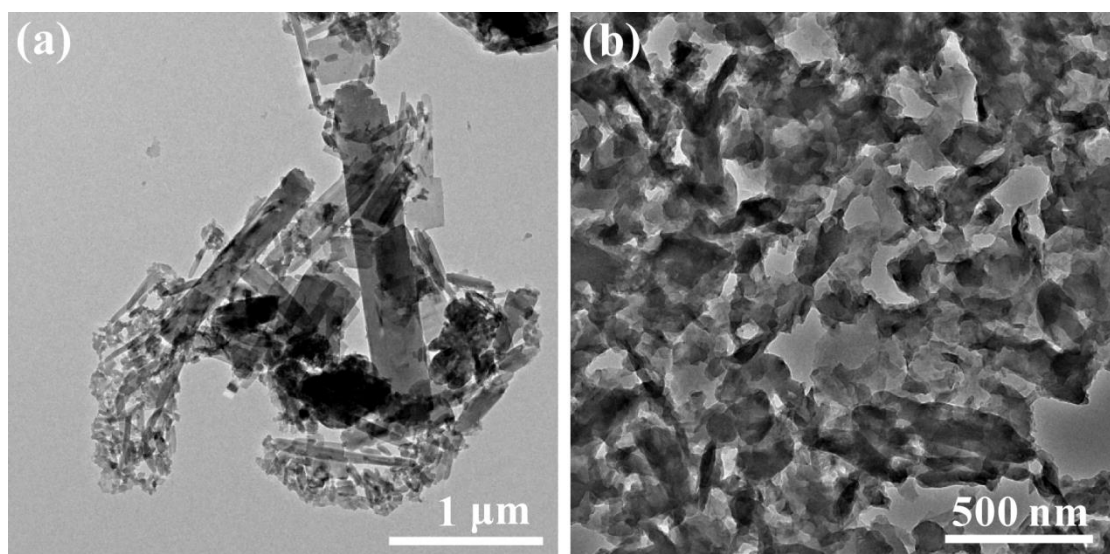

**Figure S4.** TEM images of a) CN-35% and b) CN-100%.

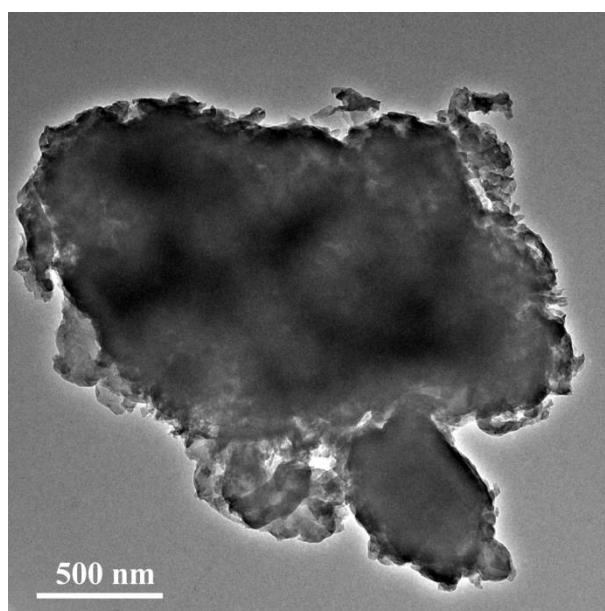

**Figure S5.** TEM image of the carbon nitrides prepared by heating dicyanamide at 560 °C using tube furnace with a heating rate of 50 °C/min.

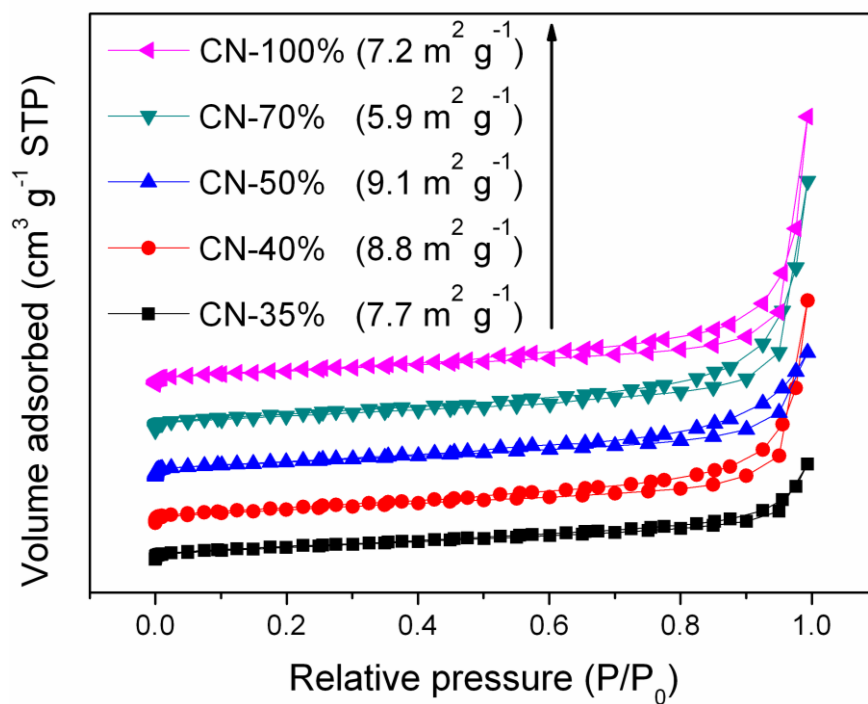

**Figure S6.**  $N_2$  adsorption isotherms recorded for the carbon nitrides synthesized at different heating powers.

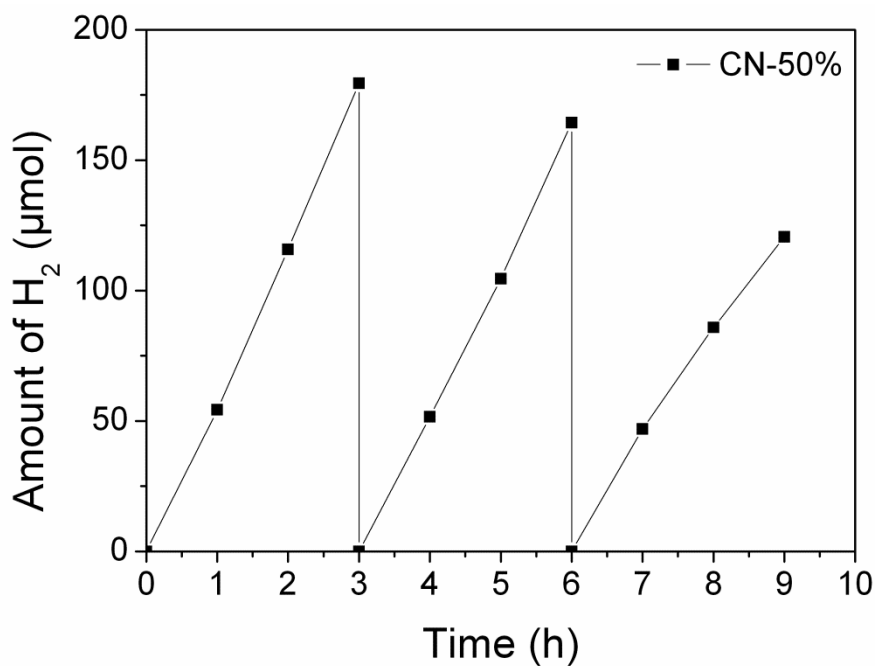

**Figure S7.** Stability test for sample CN-50% irradiated with visible light ( $> 400 \text{ nm}$ ).

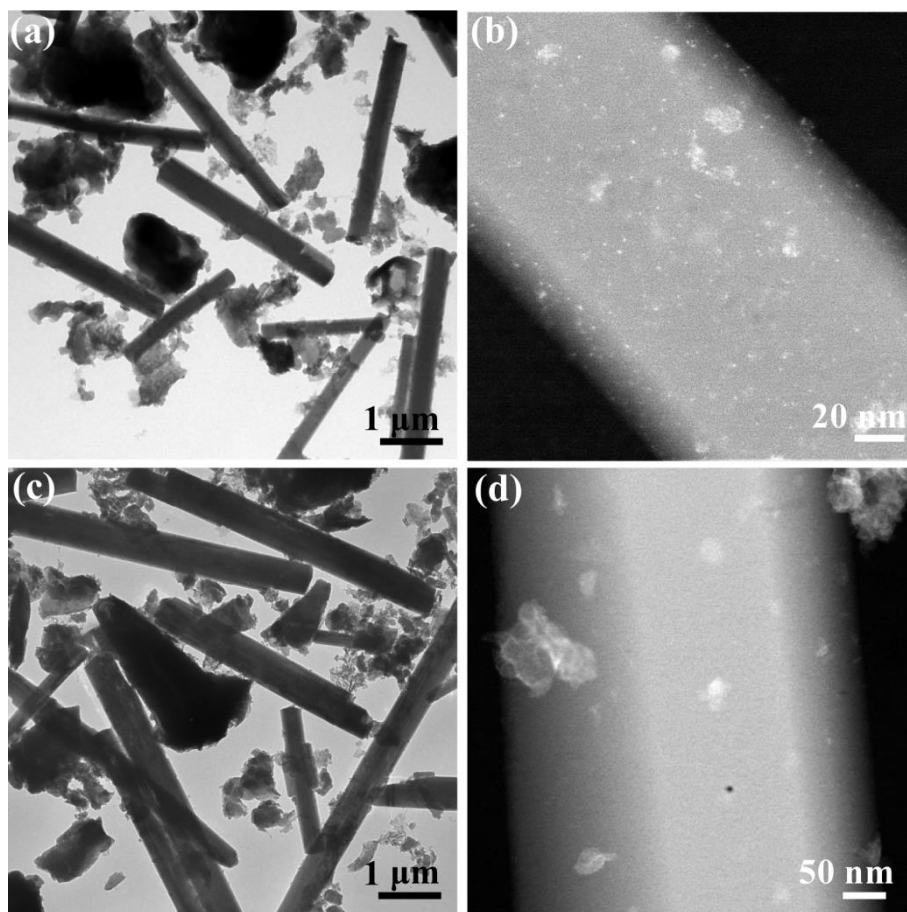

**Figure S8.** (a) TEM image and (b) HADDF-STEM image of Pt/CN-50% irradiated for 3 h. (c) TEM image and (d) HADDF-STEM image of Pt/CN-50% irradiated for 9 h.
